# Supplementary material
Source: HighWire-hosted journal article supplement (http://cmajopen.ca/highwire/filestream/84941/field_highwire_adjunct_files/3/coreq.pdf)
Supplement: coreq.pdf [file coreq.pdf]

Consolidated criteria for reporting qualitative studies (COREQ): 32-item checklist

| No                                             | Item                                     | Guide questions/description                                                                                                                 |
|------------------------------------------------|------------------------------------------|---------------------------------------------------------------------------------------------------------------------------------------------|
| <b>Domain 1: Research team and reflexivity</b> |                                          |                                                                                                                                             |
| Personal Characteristics                       |                                          |                                                                                                                                             |
| 1.                                             | Interviewer/facilitator                  | Which author/s conducted the interview or focus group?<br><b>STH, BS, MH (Line 104)</b>                                                     |
| 2.                                             | Credentials                              | What were the researcher's credentials? <i>E.g. PhD, MD</i><br><b>The interviewers were MD and LLD candidates (Lines 8-10)</b>              |
| 3.                                             | Occupation                               | What was their occupation at the time of the study?<br><b>Students (Lines 8-10)</b>                                                         |
| 4.                                             | Gender                                   | Was the researcher male or female?<br><b>The research team included 4 women and 2 men. The interviewers included two women and one man.</b> |
| 5.                                             | Experience and training                  | What experience or training did the researcher have?<br><b>Previous qualitative research (Lines 105-106)</b>                                |
| Relationship with participants                 |                                          |                                                                                                                                             |
| 6.                                             | Relationship established                 | Was a relationship established prior to study commencement?<br><b>No.</b>                                                                   |
| 7.                                             | Participant knowledge of the interviewer | What did the participants know about the researcher? <i>e.g. personal goals, reasons for</i>                                                |

| No                            | Item                                  | Guide questions/description                                                                                                                                                                                                                      |
|-------------------------------|---------------------------------------|--------------------------------------------------------------------------------------------------------------------------------------------------------------------------------------------------------------------------------------------------|
|                               |                                       | <p><i>doing the research</i></p> <p>The letter of invitation shared the purpose of the study and the backgrounds of the research team. (Lines 98-99).</p>                                                                                        |
| 8.                            | Interviewer characteristics           | <p>What characteristics were reported about the interviewer/facilitator? e.g. <i>Bias, assumptions, reasons and interests in the research topic</i></p> <p>None.</p>                                                                             |
| <b>Domain 2: study design</b> |                                       |                                                                                                                                                                                                                                                  |
| Theoretical framework         |                                       |                                                                                                                                                                                                                                                  |
| 9.                            | Methodological orientation and Theory | <p>What methodological orientation was stated to underpin the study? e.g. <i>grounded theory, discourse analysis, ethnography, phenomenology, content analysis</i></p> <p>Abductive reasoning, detailed coding and theme analysis (Line 116)</p> |
| Participant selection         |                                       |                                                                                                                                                                                                                                                  |
| 10.                           | Sampling                              | <p>How were participants selected? e.g. <i>purposive, convenience, consecutive, snowball</i></p> <p>Convenience, purposive and snowball sampling (Line 85)</p>                                                                                   |
| 11.                           | Method of approach                    | <p>How were participants approached? e.g. <i>face-to-face, telephone, mail, Participants were invited by email via list-serve (Line 97)</i></p>                                                                                                  |
| 12.                           | Sample size                           | <p>How many participants were in the study?</p> <p>16 (Line 130)</p>                                                                                                                                                                             |

| No              | Item                         | Guide questions/description                                                                                                                                                                                                      |
|-----------------|------------------------------|----------------------------------------------------------------------------------------------------------------------------------------------------------------------------------------------------------------------------------|
| 13.             | Non-participation            | How many people refused to participate or dropped out? Reasons? <b>No drop-outs, all 16 people who responded to the invitation participated in an interview (Lines 130-131)</b>                                                  |
| Setting         |                              |                                                                                                                                                                                                                                  |
| 14.             | Setting of data collection   | Where was the data collected? <i>e.g. home, clinic, workplace</i><br><b>By video meeting, phone or email (Line 104)</b>                                                                                                          |
| 15.             | Presence of non-participants | Was anyone else present besides the participants and researchers?<br><b>No</b>                                                                                                                                                   |
| 16.             | Description of sample        | What are the important characteristics of the sample? <i>e.g. demographic data, date</i><br><b>Date range, occupation, MAiD assessment experience, geographic location, age and sex (Lines 134-144)</b>                          |
| Data collection |                              |                                                                                                                                                                                                                                  |
| 17.             | Interview guide              | Were questions, prompts, guides provided by the authors?<br><b>Yes (Lines 101-102, Appendix 1)</b><br>Was it pilot tested?<br><b>It was changed iteratively as the team read transcripts and themes emerged (Lines 110-112).</b> |
| 18.             | Repeat interviews            | Were repeat interviews carried out? If yes, how many?<br><b>Yes, all participants were asked if they had any additional experiences they wanted to</b>                                                                           |

| No                                     | Item                           | Guide questions/description                                                                                               |
|----------------------------------------|--------------------------------|---------------------------------------------------------------------------------------------------------------------------|
|                                        |                                | add since more time had passed in the pandemic (Lines 113-114)                                                            |
| 19.                                    | Audio/visual recording         | Did the research use audio or visual recording to collect the data?<br>Yes, the interviews were audio recorded (Line 107) |
| 20.                                    | Field notes                    | Were field notes made during and/or after the interview or focus group?<br>No                                             |
| 21.                                    | Duration                       | What was the duration of the interviews or focus group?<br>10-45 minutes (Line 134)                                       |
| 22.                                    | Data saturation                | Was data saturation discussed?<br>Yes (Line 120)                                                                          |
| 23.                                    | Transcripts returned           | Were transcripts returned to participants for comment and/or correction?<br>Yes, (Line 112)                               |
| <b>Domain 3: analysis and findings</b> |                                |                                                                                                                           |
| Data analysis                          |                                |                                                                                                                           |
| 24.                                    | Number of data coders          | How many data coders coded the data? Three [line 121]                                                                     |
| 25.                                    | Description of the coding tree | Did authors provide a description of the coding tree?<br>No                                                               |
| 26.                                    | Derivation of themes           | Were themes identified in advance or derived from the data?<br>Derived from data (Line 118)                               |

| No        | Item                         | Guide questions/description                                                                                                                                        |
|-----------|------------------------------|--------------------------------------------------------------------------------------------------------------------------------------------------------------------|
| 27.       | Software                     | What software, if applicable, was used to manage the data?<br><b>None</b>                                                                                          |
| 28.       | Participant checking         | Did participants provide feedback on the findings?<br><b>No (line 124)</b>                                                                                         |
| Reporting |                              |                                                                                                                                                                    |
| 29.       | Quotations presented         | Were participant quotations presented to illustrate the themes / findings? Was each quotation identified? e.g. <i>participant number</i><br><b>Yes (Boxes 1-4)</b> |
| 30.       | Data and findings consistent | Was there consistency between the data presented and the findings?<br><b>Yes (Boxes 1-4 and Results section)</b>                                                   |
| 31.       | Clarity of major themes      | Were major themes clearly presented in the findings?<br><b>Yes (Lines 148-166, Boxes 1-4)</b>                                                                      |
| 32.       | Clarity of minor themes      | Is there a description of diverse cases or discussion of minor themes? <b>Yes Box 1</b>                                                                            |
